# Supplementary material for: An epigenetic classifier for early stage lung cancer
Source: PubMed Central journal article supplement (PMC5964676; doi:10.1186/s13148-018-0502-3), 2018-05-22
Supplement: 13148_2018_502_MOESM1_ESM.pdf [file 13148_2018_502_MOESM1_ESM.pdf]

## Supplementary file

**Supplementary table 1. Twenty-nine genes displayed a higher level of methylation in sputum of lung cancer patients vs. controls**

| <b>Genes</b>                 | <b>Sensitivity</b> | <b>95% confidence interval</b> | <b>Specificity</b> | <b>95% confidence interval</b> |
|------------------------------|--------------------|--------------------------------|--------------------|--------------------------------|
| <i>3OST2</i>                 | 0.53               | 0.46–0.56                      | 0.86               | 0.83–0.89                      |
| <i>APC</i>                   | 0.44               | 0.34–0.55                      | 0.88               | 0.71–0.96                      |
| <i>CDH1</i>                  | 0.36               | 0.18–0.57                      | 0.71               | 0.52–0.85                      |
| <i>CDO1</i>                  | 0.79               | 0.68–0.87                      | 0.68               | 0.44–0.86                      |
| <i>CXCL</i>                  | 0.37               | 0.27–0.47                      | 0.80               | 0.72–0.86                      |
| <i>CYGB</i>                  | 0.52               | 0.46–0.58                      | 0.80               | 0.68–0.87                      |
| <i>DAB2</i>                  | 0.04               | 0.02–0.09                      | 0.98               | 0.95–0.99                      |
| <i>DAL-1</i>                 | 0.31               | 0.22–0.39                      | 0.87               | 0.79–0.92                      |
| <i>DAPK</i>                  | 0.46               | 0.41–0.52                      | 0.80               | 0.65–0.89                      |
| <i>DCR2</i>                  | 0.42               | 0.32–0.51                      | 0.61               | 0.53–0.69                      |
| <i>FAM19A4</i>               | 0.81               | 0.73–0.87                      | 0.26               | 0.22–0.31                      |
| <i>FHIT</i>                  | 0.53               | 0.44–0.62                      | 0.92               | 0.78–0.99                      |
| <i>GATA</i>                  | 0.67               | 0.32–0.90                      | 0.54               | 0.33–0.72                      |
| <i>H-cadherin</i>            | 0.51               | 0.23–0.76                      | 0.58               | 0.45–0.69                      |
| <i>HOXA9</i>                 | 0.80               | 0.64–0.90                      | 0.51               | 0.17–0.85                      |
| <i>JPH3</i>                  | 0.32               | 0.22–0.43                      | 0.80               | 0.72–0.86                      |
| <i>KIFLA</i>                 | 0.45               | 0.36–0.56                      | 0.63               | 0.55–0.71                      |
| <i>MAGE</i>                  | 0.46               | 0.35–0.57                      | 0.83               | 0.57–0.93                      |
| <i>MGMT</i>                  | 0.43               | 0.33–0.53                      | 0.92               | 0.76–0.97                      |
| <i>p16</i>                   | 0.49               | 0.41–0.57                      | 0.91               | 0.83–0.95                      |
| <i>PAX5</i>                  | 0.38               | 0.28–0.46                      | 0.79               | 0.71–0.85                      |
| <i>PCDH20</i>                | 0.59               | 0.49–0.68                      | 0.50               | 0.40–0.59                      |
| <i>PHACTR3</i>               | 0.61               | 0.53–0.67                      | 0.69               | 0.63–0.74                      |
| <i>PRDM14</i>                | 0.63               | 0.57–0.67                      | 0.77               | 0.73–0.81                      |
| <i>RAR<math>\beta</math></i> | 0.45               | 0.29–0.62                      | 0.80               | 0.59–0.91                      |
| <i>RASSF1A</i>               | 0.29               | 0.22–0.39                      | 0.96               | 0.92–0.96                      |
| <i>SOX17</i>                 | 0.85               | 0.76–0.90                      | 0.89               | 0.69–0.98                      |
| <i>SULF2</i>                 | 0.52               | 0.41–0.62                      | 0.58               | 0.49–0.66                      |
| <i>TAC1</i>                  | 0.87               | 0.76–0.91                      | 0.76               | 0.52–0.90                      |
| <i>TCF2l</i>                 | 0.30               | 0.21–0.38                      | 0.72               | 0.62–0.79                      |
| <i>ZFP42</i>                 | 0.88               | 0.77–0.92                      | 0.64               | 0.40–0.82                      |

**Supplementary table 2.** CVs of the four analyses by ddMSP and qMSP on the same specimens

| Diluted samples | ddMSP      |       |        |       |       |      |       | qMSP       |       |        |       |        |      |       | Fold |
|-----------------|------------|-------|--------|-------|-------|------|-------|------------|-------|--------|-------|--------|------|-------|------|
|                 | Analyse #1 | #2    | #3     | #4    | mean  | SD   | %CV   | Analyse #1 | #2    | #3     | #4    | mean   | SD   | %CV   |      |
| 100.00          | 101.00     | 98.00 | 100.00 | 98.00 | 99.00 | 1.41 | 1.43  | 103.00     | 97.00 | 103.00 | 99.00 | 101.00 | 3.00 | 2.99  | 2.09 |
| 25.00           | 23.00      | 25.00 | 26.00  | 25.00 | 25.50 | 0.71 | 2.77  | 22.00      | 26.00 | 25.00  | 23.00 | 24.00  | 1.83 | 7.61  | 2.74 |
| 6.25            | 6.23       | 6.26  | 6.25   | 6.23  | 6.24  | 0.01 | 0.23  | 6.21       | 6.22  | 6.30   | 6.26  | 6.24   | 0.04 | 0.66  | 2.90 |
| 1.56            | 1.57       | 1.54  | 1.57   | 1.56  | 1.57  | 0.01 | 0.45  | 1.60       | 1.54  | 1.57   | 1.53  | 1.56   | 0.03 | 2.03  | 4.49 |
| 0.39            | 0.38       | 0.39  | 0.40   | 0.39  | 0.40  | 0.01 | 1.79  | 0.39       | 0.35  | 0.40   | 0.39  | 0.39   | 0.02 | 5.80  | 3.24 |
| 0.10            | 0.11       | 0.09  | 0.10   | 0.11  | 0.11  | 0.01 | 6.73  | 0.14       | 0.11  | 0.09   | 0.12  | 0.12   | 0.02 | 18.10 | 2.69 |
| 0.04            | 0.03       | 0.02  | 0.04   | 0.03  | 0.04  | 0.01 | 20.20 |            |       |        |       |        |      |       |      |
| 0.00            |            |       |        |       |       |      |       |            |       |        |       |        |      |       |      |

CV, coefficient of variation.

**Supplementary table 3.** CVs of of repeated measures by ddMSP and qMSP on different times

| Diluted samples | ddMSP   |         |         |         |      |      | qMSP    |         |         |         |       |      | Fold |
|-----------------|---------|---------|---------|---------|------|------|---------|---------|---------|---------|-------|------|------|
|                 | Day 1   | 2       | 3       | mean    | SD   | %CV  | Day 1   | 2       | 3       | mean    | SD    | %CV  |      |
| 5000.00         | 5001.00 | 5008.00 | 4992.00 | 5001.00 | 6.56 | 0.13 | 5009.00 | 4998.00 | 4972.00 | 4998.00 | 19.00 | 0.38 | 2.90 |
| 2500.00         | 2503.00 | 2506.00 | 2490.00 | 2503.00 | 7.14 | 0.29 | 2512.00 | 2500.00 | 2478.00 | 2500.00 | 17.24 | 0.69 | 2.42 |
| 1250.00         | 1249.00 | 1235.00 | 1253.00 | 1249.00 | 7.90 | 0.63 | 1243.00 | 1228.00 | 1264.00 | 1243.00 | 18.08 | 1.45 | 2.29 |
| 625.00          | 626.00  | 626.00  | 622.00  | 626.00  | 2.00 | 0.32 | 628.00  | 625.00  | 612.00  | 625.00  | 8.50  | 1.37 | 4.28 |
| 313.00          | 312.00  | 317.00  | 310.00  | 312.00  | 2.99 | 0.95 | 310.00  | 320.00  | 306.00  | 310.00  | 7.21  | 2.31 | 2.42 |
| 0.00            | 154.00  | 149.00  | 156.00  | 154.00  | 2.99 | 1.95 |         |         |         |         |       |      |      |

CV, coefficient of variation.

**Supplementary table 4.** CVs of repeated measures by different researches using ddMSP and qMSP

| Diluted samples | ddMSP         |               |      |      |      | qMSP          |               |         |       |      | Fold |
|-----------------|---------------|---------------|------|------|------|---------------|---------------|---------|-------|------|------|
|                 | Researcher #1 | Researcher #2 | mean | SD   | %CV  | Researcher #1 | Researcher #2 | mean    | SD    | %CV  |      |
| 5000.00         | 5003.00       | 5008.00       | 5006 | 3.54 | 0.07 | 5010.00       | 4993.00       | 5001.50 | 12.02 | 0.24 | 3.40 |
| 2500.00         | 2505.00       | 2502.00       | 2504 | 2.12 | 0.06 | 2499.00       | 2505.00       | 2502.00 | 4.24  | 0.17 | 2.83 |
| 1250.00         | 1245.00       | 1233.00       | 1239 | 8.49 | 0.48 | 1241.00       | 1220.00       | 1230.50 | 14.85 | 1.21 | 2.49 |
| 625.00          | 627.00        | 623.00        | 625  | 2.83 | 0.32 | 622.00        | 630.00        | 626.00  | 5.66  | 0.90 | 2.82 |
| 313.00          | 311.00        | 316.00        | 314  | 3.54 | 0.80 | 312.00        | 322.00        | 317.00  | 7.07  | 2.23 | 2.80 |
| 156.00          | 153.00        | 158.00        | 156  | 3.54 | 1.61 |               |               |         |       |      |      |
| 0.00            |               |               |      |      |      |               |               |         |       |      |      |

CV, coefficient of variation.

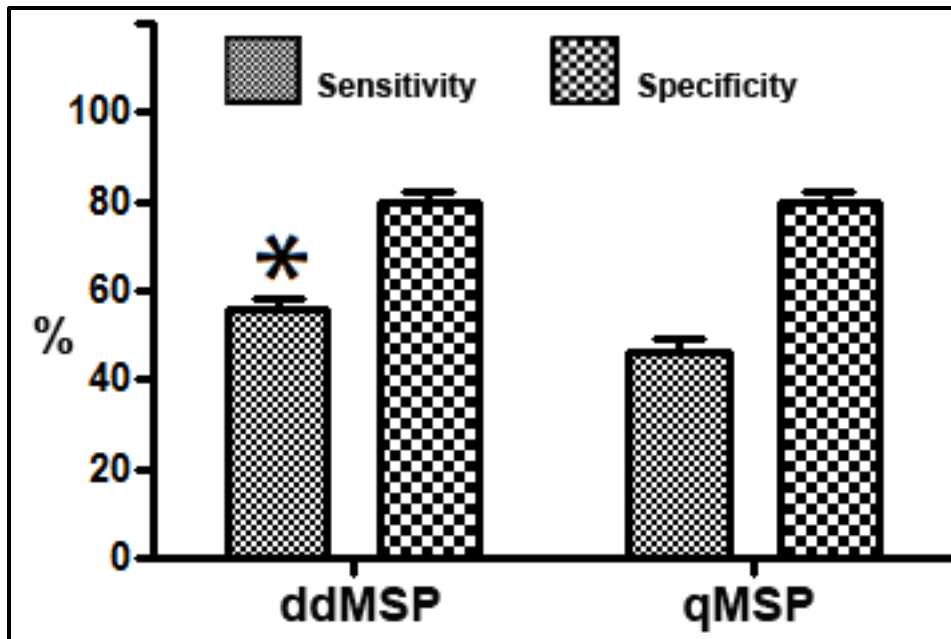

**Supplementary Fig. 1.** Sensitivities and specificities of measuring DNA methylation of RASSF1A by ddMSP and qMSP for diagnosis of lung cancer in sputum samples of 20 cancer-free controls (normal subjects, N) and 20 patients diagnosed with lung tumor (T). ddMSP analysis of DNA methylation of RASSF1A had a higher sensitivity (55%) than did qMSP (45%) ( $p=0.01$ ) for distinguishing lung cancer cases from controls, while maintaining the same specificity (80%). \*,  $p=0.01$ .
